# Supplementary material for: Potential Modulation of Inflammation and Physical Function by Combined Probiotics, Omega-3 Supplementation and Vitamin D Supplementation in Overweight/Obese Patients with Chronic Low-Grade Inflammation: A Randomized, Placebo-Controlled Trial
Source: MDPI journal article supplement (doi:10.3390/ijms24108567), 2023-05-10
Supplement: s1 [file s1]

**Table S1.** Fatty acid changes in plasma

|                        | Placebo |   |       |       |   | Treatment group |       |    |       |       | Between groups |            |                                      |         |         |
|------------------------|---------|---|-------|-------|---|-----------------|-------|----|-------|-------|----------------|------------|--------------------------------------|---------|---------|
|                        | W0      |   | W8    |       |   | W0              |       | W8 |       |       | p-value W0     | p-value W8 | p-value Δ W8- W0<br>Treatment effect |         |         |
| Fatty acids [mg/100μl] |         |   |       |       |   |                 |       |    |       |       |                |            |                                      |         |         |
| 14:1                   | 0.20    | ± | 0.12  | 0.24  | ± | 0.20            | 0.25  | ±  | 0.22  | 0.45  | ±              | 0.34***    | 0.743                                | 0.002   | 0.002   |
| 16:1                   | 1.26    | ± | 0.71  | 1.44  | ± | 0.68*           | 1.45  | ±  | 0.65  | 1.81  | ±              | 0.62***    | 0.120                                | 0.005   | 0.005   |
| 16:1 n-7               | 5.45    | ± | 3.14  | 5.91  | ± | 3.08            | 5.79  | ±  | 2.00  | 7.36  | ±              | 2.88***    | 0.159                                | 0.009   | 0.009   |
| 17:1                   | 0.37    | ± | 0.28  | 0.41  | ± | 0.31            | 0.41  | ±  | 0.22  | 0.58  | ±              | 0.23***    | 0.078                                | < 0.001 | < 0.001 |
| 18:1 n-9 c             | 41.49   | ± | 15.46 | 44.24 | ± | 14.19           | 44.96 | ±  | 17.83 | 46.45 | ±              | 20.70      | 0.147                                | 0.588   | 0.588   |
| 18:1                   | 3.56    | ± | 1.78  | 3.79  | ± | 1.74            | 4.12  | ±  | 1.67  | 5.16  | ±              | 1.53**     | 0.150                                | < 0.001 | < 0.001 |
| 20:1                   | 0.32    | ± | 0.22  | 0.42  | ± | 0.42            | 0.36  | ±  | 0.24  | 0.56  | ±              | 0.43       | 0.496                                | 0.104   | 0.104   |
| 18:2 n-6 (LA)          | 53.89   | ± | 20.00 | 60.35 | ± | 18.87*          | 60.35 | ±  | 22.01 | 70.58 | ±              | 18.97***   | 0.159                                | 0.022   | 0.022   |
| 20:2 n-6               | 0.39    | ± | 0.16  | 0.42  | ± | 0.15            | 0.39  | ±  | 0.13  | 0.49  | ±              | 0.24**     | 0.666                                | 0.260   | 0.260   |
| 18:3 n-6               | 1.07    | ± | 0.62  | 1.20  | ± | 0.63            | 1.40  | ±  | 0.79  | 1.51  | ±              | 0.78       | 0.055                                | 0.067   | 0.067   |
| 18:3 n-3 (ALA)         | 1.26    | ± | 0.82  | 1.36  | ± | 0.94            | 1.56  | ±  | 1.27  | 1.88  | ±              | 1.25*      | 0.369                                | 0.018   | 0.018   |
| 20:3 n-6               | 3.91    | ± | 2.16  | 4.50  | ± | 1.98*           | 4.56  | ±  | 1.91  | 5.35  | ±              | 1.82**     | 0.036                                | 0.035   | 0.035   |
| 20:4 n-6 (AA)          | 15.25   | ± | 7.34  | 17.93 | ± | 7.12**          | 19.16 | ±  | 6.33  | 20.85 | ±              | 6.58*      | 0.003                                | 0.020   | 0.020   |
| 20:5 n-3 (EPA)         | 1.70    | ± | 1.16  | 2.50  | ± | 4.04*           | 2.68  | ±  | 1.80  | 5.48  | ±              | 2.12***    | 0.002                                | < 0.001 | < 0.001 |
| 22:5 n-3 (DPA)         | 1.85    | ± | 1.30  | 2.60  | ± | 1.75**          | 2.44  | ±  | 1.52  | 3.62  | ±              | 1.72***    | 0.085                                | 0.004   | 0.004   |
| 22:6 n-3 (DHA)         | 6.46    | ± | 2.91  | 8.65  | ± | 6.34**          | 9.64  | ±  | 4.36  | 12.46 | ±              | 3.39**     | < 0.001                              | < 0.001 | < 0.001 |
| PUFA                   | 0.60    | ± | 0.41  | 0.73  | ± | 0.39            | 0.70  | ±  | 0.39  | 0.62  | ±              | 0.40       | 0.091                                | 0.251   | 0.251   |
| n-3 FA                 | 11.27   | ± | 5.01  | 15.11 | ± | 12.09**         | 16.32 | ±  | 6.79  | 23.44 | ±              | 6.45***    | < 0.001                              | < 0.001 | < 0.001 |
| n-6 FA                 | 74.51   | ± | 29.09 | 84.39 | ± | 27.04*          | 85.86 | ±  | 28.73 | 98.79 | ±              | 26.10**    | 0.078                                | 0.012   | 0.012   |

Means of fatty acid concentrations in plasma in mg/100 μL at study time points W0 and W8 in the treatment group and the placebo group are shown, as well as the p-value of W8 as group differences. Abbreviations: AA, arachidonic acid; ALA, α-linolenic acid; DHA, docosahexaenoic acid; DPA, docosapentaenoic acid; EPA, eicosapentaenoic acid; LA, linoleic acid; n, omega; W, week. Statistics: \* differences between week 0 and W8 within the placebo group and the treatment and p-value at W8 as group difference. \*p < 0.05; \*\*p < 0.01; and \*\*\*p < 0.001

**Table S2.** Physical function tests, SCFAs and gut barrier markers

|                                          |       |   | Placebo |       |   |                             |       |   | Treatment |       |   | Between groups |       |   |                             |        |   |        |       |       |                             |  |  |
|------------------------------------------|-------|---|---------|-------|---|-----------------------------|-------|---|-----------|-------|---|----------------|-------|---|-----------------------------|--------|---|--------|-------|-------|-----------------------------|--|--|
| W0                                       |       |   | W8      |       |   | Δ W8-W0<br>Treatment effect |       |   | W0        |       |   | W8             |       |   | Δ W8-W0<br>Treatment effect |        |   | W8     |       |       | Δ W8-W0<br>Treatment effect |  |  |
| <i>Physical function tests</i>           |       |   |         |       |   |                             |       |   |           |       |   |                |       |   |                             |        |   |        |       |       |                             |  |  |
| 5 STS [s]                                | 10.9  | ± | 3.2     | 10.1* | ± | 3.3                         | -0.75 | ± | 1.78      | 11    | ± | 3.1            | 10.3* | ± | 2.9                         | -0.67  | ± | 2.38   | 0.503 | 0.823 |                             |  |  |
| WOMAC score                              | 14.1  | ± | 14.5    | 13.3  | ± | 16.7                        | -0.8  | ± | 6.8       | 19.1  | ± | 17.7           | 15.8* | ± | 17.7                        | -3.4   | ± | 7.1    | 0.346 | 0.095 |                             |  |  |
| <i>SCFAs [μmol/g wet mass]</i>           |       |   |         |       |   |                             |       |   |           |       |   |                |       |   |                             |        |   |        |       |       |                             |  |  |
| Acetic acid                              | 61.7  | ± | 26.5    | 58.5  | ± | 23.2                        | -3.15 | ± | 16.05     | 62.5  | ± | 25.9           | 62.1  | ± | 21.9                        | -0.34  | ± | 17.27  | 0.350 | 0.480 |                             |  |  |
| Propionic acid                           | 16.6  | ± | 7.6     | 15.4  | ± | 6.4                         | -1.13 | ± | 5.56      | 19.3  | ± | 8.7            | 17.1* | ± | 9.6                         | -2.20  | ± | 7.92   | 0.381 | 0.146 |                             |  |  |
| Iso-butyric acid                         | 1.7   | ± | 0.8     | 1.7   | ± | 0.8                         | 0.03  | ± | 1.04      | 1.6   | ± | 0.7            | 1.5   | ± | 0.5                         | -0.13  | ± | 0.69   | 0.259 | 0.442 |                             |  |  |
| Butyric acid                             | 13.6  | ± | 6.9     | 12.1  | ± | 6.1                         | -1.52 | ± | 6.24      | 14.2  | ± | 7.3            | 14.2  | ± | 8.6                         | 0.01   | ± | 8.04   | 0.362 | 0.371 |                             |  |  |
| Iso-valeric acid                         | 2.1   | ± | 1.2     | 2.3   | ± | 1.1                         | 0.11  | ± | 1.52      | 2.0   | ± | 0.9            | 1.8   | ± | 0.8                         | -0.14  | ± | 0.99   | 0.102 | 0.407 |                             |  |  |
| Valeric acid                             | 1.9   | ± | 0.9     | 1.8   | ± | 0.9                         | -0.09 | ± | 1.10      | 1.8   | ± | 0.8            | 1.9   | ± | 1.0                         | 0.02   | ± | 1.02   | 0.888 | 0.682 |                             |  |  |
| Iso-caproic acid                         | 0.2   | ± | 0.2     | 0.2   | ± | 0.2                         | 0.00  | ± | 0.18      | 0.2   | ± | 0.2            | 0.2   | ± | 0.2                         | 0.02   | ± | 0.17   | 0.791 | 0.662 |                             |  |  |
| Hexanoic acid                            | 0.5   | ± | 0.5     | 0.5   | ± | 0.5                         | -0.05 | ± | 0.32      | 0.4   | ± | 0.5            | 0.4   | ± | 0.5                         | -0.02  | ± | 0.45   | 0.636 | 0.440 |                             |  |  |
| Heptanoic acid                           | 0.1   | ± | 0.1     | 0.1   | ± | 0.1                         | -0.01 | ± | 0.08      | 0.1   | ± | 0.1            | 0.1   | ± | 0.1                         | 0.00   | ± | 0.08   | 0.534 | 0.407 |                             |  |  |
| <i>Multi-sugar urinary recovery test</i> |       |   |         |       |   |                             |       |   |           |       |   |                |       |   |                             |        |   |        |       |       |                             |  |  |
| <i>0-5 hrs</i>                           |       |   |         |       |   |                             |       |   |           |       |   |                |       |   |                             |        |   |        |       |       |                             |  |  |
| L/R ratio                                | 0.176 | ± | 0.642   | 0.059 | ± | 0.043                       | -     | ± | 0.606     | 0.066 | ± | 0.052          | 0.074 | ± | 0.059                       | 0.008  | ± | 0.051  | 0.238 | 0.358 |                             |  |  |
| sucrose [μg/mL]                          | 29.37 | ± | 44.85   | 31.78 | ± | 54.70                       | 2.41  | ± | 60.09     | 45.17 | ± | 153.94         | 50.39 | ± | 110.27                      | 5.44   | ± | 100.79 | 0.718 | 0.439 |                             |  |  |
| <i>5-24 hrs</i>                          |       |   |         |       |   |                             |       |   |           |       |   |                |       |   |                             |        |   |        |       |       |                             |  |  |
| S/E ratio                                | 0.025 | ± | 0.010   | 0.031 | ± | 0.018                       | 0.005 | ± | 0.018     | 0.031 | ± | 0.033          | 0.027 | ± | 0.010                       | -0.004 | ± | 0.030  | 0.541 | 0.541 |                             |  |  |
| <i>Gut barrier markers</i>               |       |   |         |       |   |                             |       |   |           |       |   |                |       |   |                             |        |   |        |       |       |                             |  |  |
| I-FABP [pg/ml]                           | 482   | ± | 354     | 500   | ± | 313                         | 17.45 | ± | 230.90    | 574   | ± | 348            | 563   | ± | 317                         | 4.01   | ± | 392.50 | 0.251 | 0.326 |                             |  |  |
| Zonulin                                  | 191.9 | ± | 137.8   | 185.9 | ± | 115.6                       | -     | ± | 145,8     | 184.3 | ± | 149.3          | 165.6 | ± | 111.6                       | -18.69 | ± | 166.1  | 0.329 | 0.798 |                             |  |  |

Values are given as mean  $\pm$  SD. Statistic:\* Shows significant differences between W0 and W8 within each group. Abbreviations: IFN- $\gamma$ ; interferon gamma; IL-, Interleukin-; TNF- $\alpha$ , tumor necrosis factor- $\alpha$ ; W, week; L/R, lactulose/rhamnose; S/E, sucralose/erythritol. Statistics: no difference within groups and between groups.
